# Supplementary material for: Single-cell RNA-seq analysis identifies meniscus progenitors and reveals the progression of meniscus degeneration
Source: PubMed Central journal article supplement (PMC7034356; doi:10.1136/annrheumdis-2019-215926), 2019-12-23
Supplement: annrheumdis-2019-215926supp002.pdf [file annrheumdis-2019-215926supp002.pdf]

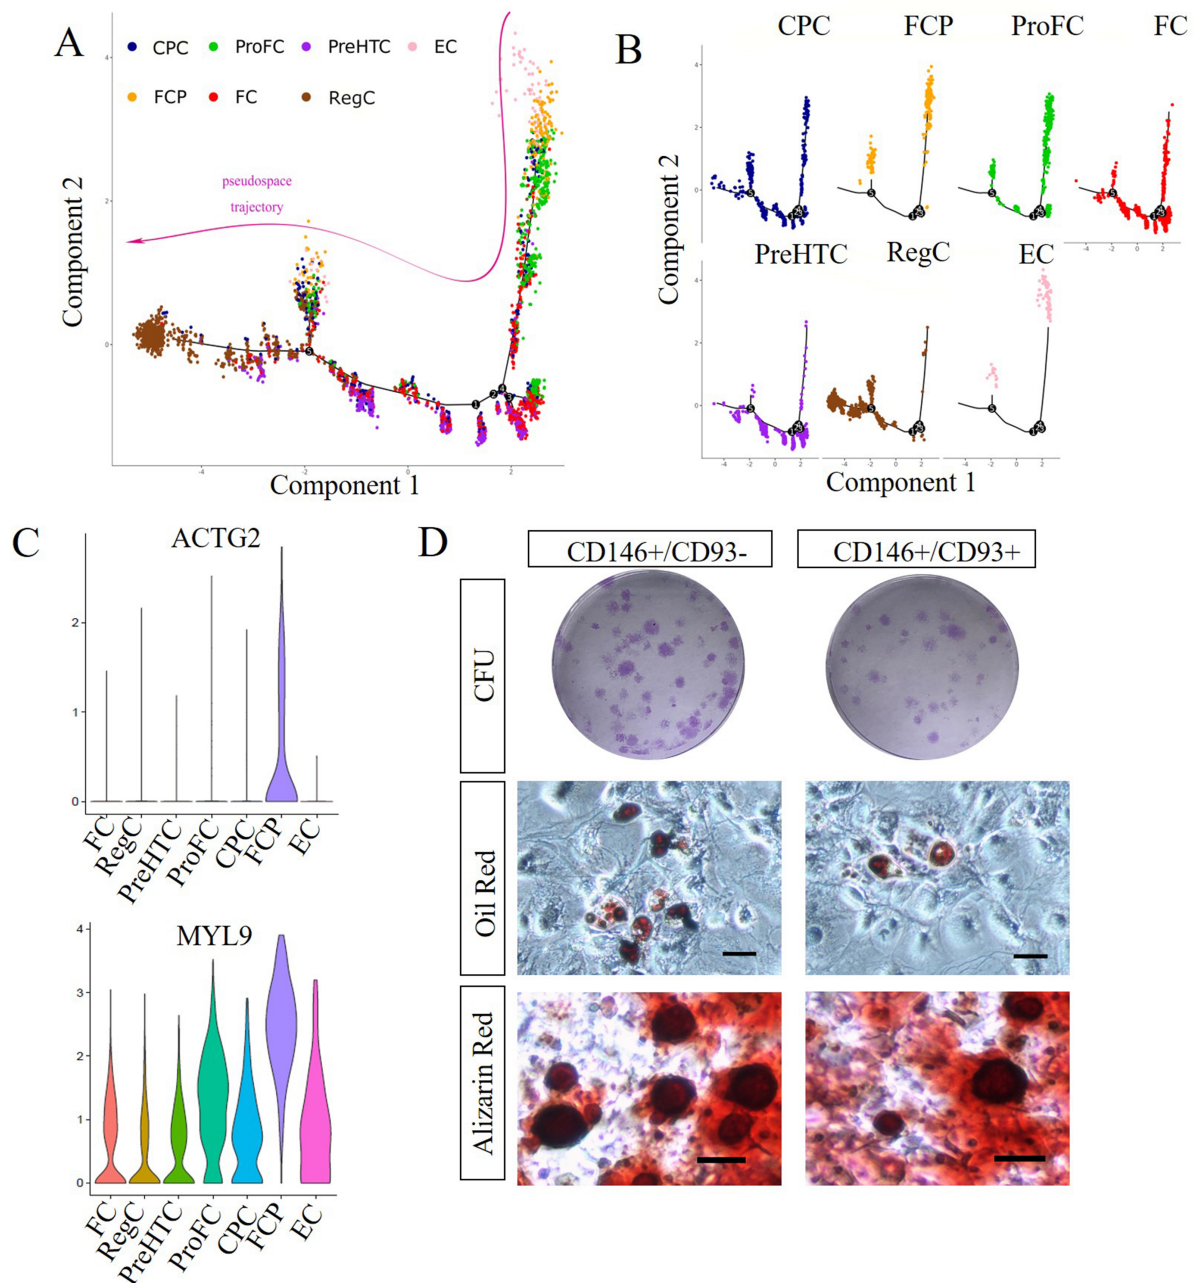

Supplementary Figure S2. Reconstruction of single-cell trajectory using Monocle 2 for healthy human meniscus cells.
