# Supplementary material for: Single-cell RNA-seq analysis identifies meniscus progenitors and reveals the progression of meniscus degeneration
Source: PubMed Central journal article supplement (PMC7034356; doi:10.1136/annrheumdis-2019-215926), 2019-12-23
Supplement: annrheumdis-2019-215926supp003.pdf [file annrheumdis-2019-215926supp003.pdf]

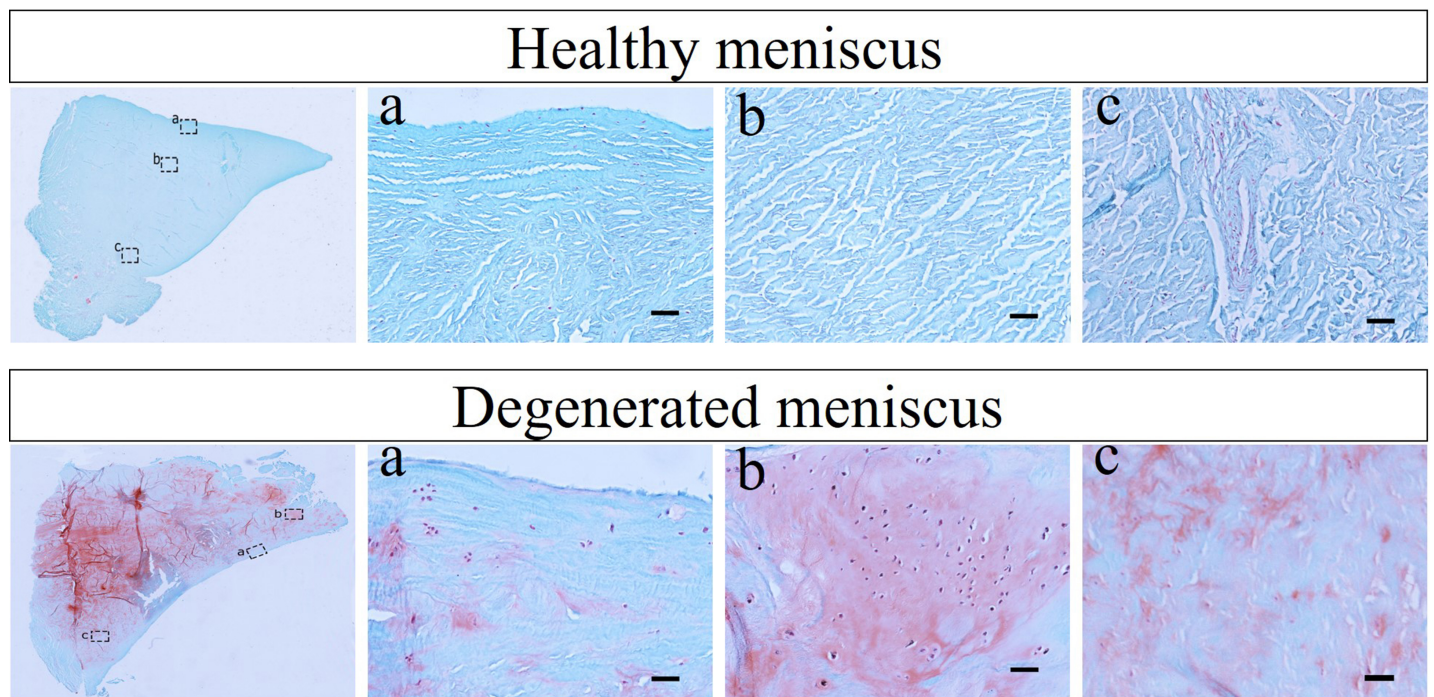

**Supplementary Figure S3. Panoramic scanning of Safranin O/Fast Green staining of healthy human and degenerated meniscus.**
