# Supplementary material for: Single-cell RNA-seq analysis identifies meniscus progenitors and reveals the progression of meniscus degeneration
Source: PubMed Central journal article supplement (PMC7034356; doi:10.1136/annrheumdis-2019-215926), 2019-12-23
Supplement: annrheumdis-2019-215926supp004.pdf [file annrheumdis-2019-215926supp004.pdf]

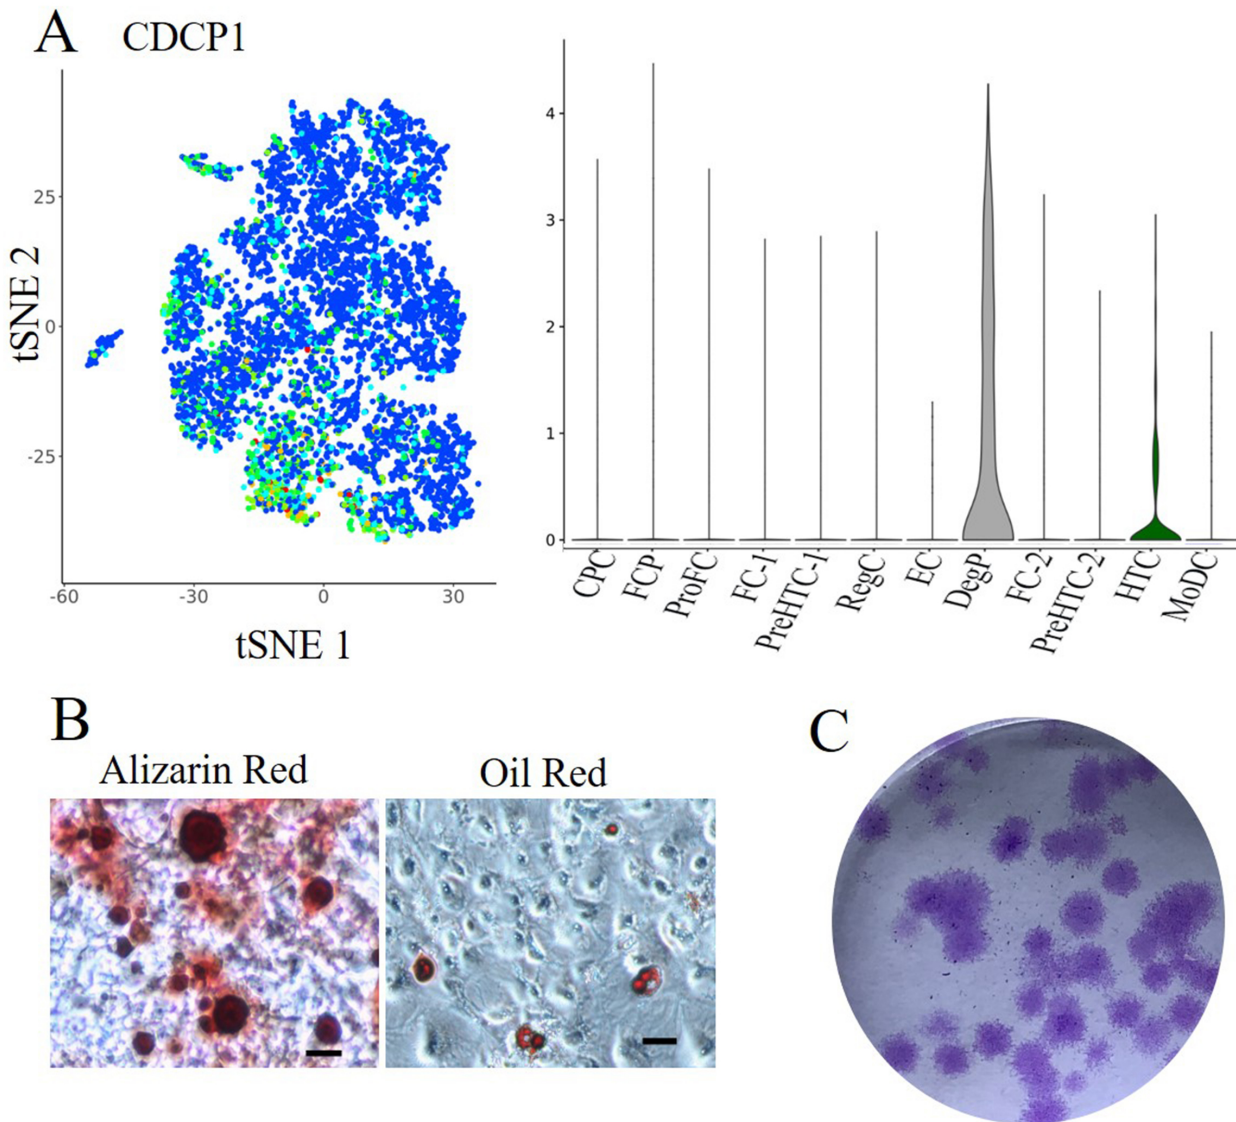

**Supplementary Figure S4. CD318<sup>+</sup> degenerated meniscus cells have characteristics of progenitor cells.**
