# Supplementary material for: Single-cell RNA-seq analysis identifies meniscus progenitors and reveals the progression of meniscus degeneration
Source: PubMed Central journal article supplement (PMC7034356; doi:10.1136/annrheumdis-2019-215926), 2019-12-23
Supplement: annrheumdis-2019-215926supp008.pdf [file annrheumdis-2019-215926supp008.pdf]

**Supplementary Table 1:** Primers for quantitative real-time polymerase chain reaction (qRT-PCR).

| Gene       |   | Primer sequence (5'-3') |
|------------|---|-------------------------|
| hsa-COL1A1 | F | GAGGGCCAAGACGAAGACATC   |
| hsa-COL1A1 | R | CAGATCACGTCATCGACAAC    |
| hsa-COL3A1 | F | GCCAAATATGTGTCTGTGACTCA |
| hsa-COL3A1 | R | GGGCGAGTAGGAGCAGTTG     |
| hsa-MMP1   | F | CTCTGGAGTAATGTCACACCTCT |
| hsa-MMP1   | R | TGTTGGTCCACCTTTCATCTTC  |
| hsa-MMP3   | F | CTGGACTCCGACACTCTGGA    |
| hsa-MMP3   | R | CAGGAAAGGTTCTGAAGTGACC  |
| hsa-CDK1   | F | AAACTACAGGTCAAGTGGTAGCC |
| hsa-CDK1   | R | TCCTGCATAAGCACATCCTGA   |
| hsa-CDCP1  | F | CTGAACTGCGGGTCTCTATC    |
| hsa-CDCP1  | R | GTCCCCAGCTTTATGAGAACTG  |
| hsa-DNER   | F | AAGGCTATGAAGGTCCCAACT   |
| hsa-DNER   | R | CTGAGAGCGAGGCAGGATTT    |
| hsa-MCAM   | F | AGCTCCGCGTCTACAAAGC     |
| hsa-MCAM   | R | CTACACAGGTAGCGACCTCC    |
| hsa-S100A9 | F | GGTCATAGAACACATCATGGAGG |
| hsa-S100A9 | R | GGCCTGGCTTATGGTGGTG     |
| hsa-CD93   | F | CCGGAAGTAACATTGAGGGCT   |
| hsa-CD93   | R | TCTGAGTCTCGTCCCTTGTCAC  |
| hsa-GAPDH  | F | GCACCGTCAAGGCTGAGAAC    |
| hsa-GAPDH  | R | TGGTGAAGACGCCAGTGGA     |
